# Supplementary material for: The protective role of water intake in age-related eye diseases: insights from a Mendelian randomization study
Source: Royal Society of Chemistry journal article supplement (doi:10.1039/d4fo01559b), 2024-01-01
Supplement: d4fo01559b1.pdf [file d4fo01559b1.pdf]

### Supplementary Material

Mi, et al. The Protective Role of Water Intake in Age-Related Eye Diseases: Insights from a Mendelian Randomization Study

**Supplementary Table S1.** Final SNPs in each trait used in MR analysis.

**Supplementary Table S2.** The overall F statistic of four analyses.

**Supplementary Table S3.** Confounding Factors Eliminated SNPs by PhenoScanner.

**Supplementary Figure S1.** Leave-one-out sensitivity analyses of MR analyses.

**Supplementary Figure S2.** Validation dataset.

**Supplementary Table S1.** Data sources used to identify genetic variants in this study.

(A) Water intake || id:ukb-b-14898 on Senile cataract || id:finn-b-H7\_CATARACTSENILE (34-SNP- $P < 5.0 \times 10^{-8}$ )

| Variant<br>rsID | Chr | Position  | Effect Allele | Other Allele | Association with Exposure |       |          | Association with Outcome |       |       |
|-----------------|-----|-----------|---------------|--------------|---------------------------|-------|----------|--------------------------|-------|-------|
|                 |     |           |               |              | Beta                      | SE    | P        | Beta                     | SE    | P     |
| rs10954732      | 7   | 75611149  | A             | G            | 0.011                     | 0.002 | 3.60E-08 | -0.004                   | 0.012 | 0.758 |
| rs11012726      | 10  | 21797272  | C             | T            | -0.012                    | 0.002 | 6.20E-10 | 0.019                    | 0.013 | 0.126 |
| rs11125629      | 2   | 24732568  | G             | A            | 0.011                     | 0.002 | 2.50E-09 | 0.006                    | 0.012 | 0.588 |
| rs11140831      | 9   | 87647454  | G             | A            | -0.012                    | 0.002 | 1.50E-11 | -0.002                   | 0.012 | 0.896 |
| rs1963510       | 14  | 98647033  | G             | A            | 0.013                     | 0.002 | 2.60E-13 | -0.003                   | 0.012 | 0.801 |
| rs2198234       | 2   | 104159202 | T             | G            | 0.012                     | 0.002 | 1.30E-10 | -0.007                   | 0.012 | 0.529 |
| rs2229357       | 12  | 57843711  | A             | G            | -0.012                    | 0.002 | 7.90E-09 | 0.022                    | 0.014 | 0.110 |
| rs2274156       | 6   | 33857564  | T             | C            | -0.011                    | 0.002 | 2.90E-08 | -0.002                   | 0.013 | 0.867 |
| rs2289292       | 16  | 30097630  | T             | C            | -0.013                    | 0.002 | 3.40E-11 | 0.015                    | 0.012 | 0.214 |
| rs2305813       | 1   | 150981267 | C             | G            | -0.019                    | 0.003 | 5.00E-12 | 0.003                    | 0.015 | 0.825 |
| rs2435200       | 17  | 44071851  | A             | G            | 0.011                     | 0.002 | 1.10E-09 | 0.008                    | 0.012 | 0.503 |
| rs2472297       | 15  | 75027880  | T             | C            | -0.033                    | 0.002 | 2.40E-59 | 0.039                    | 0.013 | 0.004 |
| rs34940743      | 14  | 80102233  | G             | A            | -0.010                    | 0.002 | 4.40E-08 | 0.019                    | 0.012 | 0.115 |
| rs34967813      | 1   | 237841390 | G             | A            | -0.012                    | 0.002 | 7.10E-10 | 0.005                    | 0.013 | 0.705 |
| rs35028442      | 9   | 115207868 | C             | G            | 0.016                     | 0.003 | 9.90E-10 | -0.011                   | 0.018 | 0.561 |
| rs3746410       | 20  | 34190870  | G             | A            | 0.017                     | 0.002 | 7.30E-14 | -0.002                   | 0.015 | 0.903 |
| rs3763874       | 11  | 9546587   | A             | G            | 0.016                     | 0.002 | 6.90E-19 | -0.012                   | 0.013 | 0.348 |
| rs3808058       | 7   | 127668071 | T             | C            | 0.018                     | 0.003 | 7.50E-11 | 0.019                    | 0.019 | 0.306 |
| rs4239466       | 18  | 52612778  | C             | A            | 0.011                     | 0.002 | 2.00E-08 | 0.028                    | 0.012 | 0.015 |
| rs429358        | 19  | 45411941  | C             | T            | 0.017                     | 0.003 | 3.00E-11 | -0.024                   | 0.015 | 0.119 |
| rs4410790       | 7   | 17284577  | C             | T            | -0.031                    | 0.002 | 8.60E-61 | 0.009                    | 0.012 | 0.467 |
| rs4603502       | 15  | 47874654  | C             | T            | -0.013                    | 0.002 | 5.40E-11 | -0.012                   | 0.014 | 0.374 |
| rs56100328      | 20  | 45939264  | G             | A            | -0.018                    | 0.003 | 4.80E-08 | -0.001                   | 0.020 | 0.960 |
| rs67174962      | 5   | 164760067 | A             | G            | -0.012                    | 0.002 | 1.30E-08 | 0.013                    | 0.015 | 0.385 |
| rs6835325       | 4   | 46746220  | G             | T            | -0.012                    | 0.002 | 2.00E-09 | 0.012                    | 0.012 | 0.300 |
| rs6844845       | 4   | 24206877  | G             | A            | -0.022                    | 0.004 | 3.30E-08 | 0.009                    | 0.037 | 0.810 |
| rs6905712       | 6   | 165246071 | A             | T            | 0.011                     | 0.002 | 8.90E-09 | 0.007                    | 0.013 | 0.581 |
| rs6957745       | 7   | 73056750  | C             | T            | -0.015                    | 0.002 | 1.40E-11 | 0.007                    | 0.015 | 0.622 |
| rs7124005       | 11  | 131658253 | T             | C            | 0.010                     | 0.002 | 2.50E-08 | 0.013                    | 0.012 | 0.254 |
| rs7626335       | 3   | 71575177  | C             | A            | 0.011                     | 0.002 | 2.50E-08 | -0.011                   | 0.012 | 0.389 |
| rs8054636       | 16  | 19246136  | C             | T            | -0.010                    | 0.002 | 2.40E-08 | 0.018                    | 0.012 | 0.126 |
| rs9414686       | 9   | 141019422 | T             | C            | 0.015                     | 0.002 | 8.60E-10 | -0.031                   | 0.018 | 0.083 |
| rs9830293       | 3   | 52147485  | G             | A            | 0.019                     | 0.003 | 4.00E-08 | -0.017                   | 0.017 | 0.321 |
| rs9957088       | 18  | 28509237  | T             | C            | -0.012                    | 0.002 | 1.40E-08 | 0.010                    | 0.014 | 0.443 |

(B) Water intake || id:ukb-b-14898 on Age-related macular degeneration (whether dry or wet) || id:finn-b-H7\_AMD (30-SNP- $P < 5.0 \times 10^{-8}$ )

| Variant<br>rsID | Chr | Position  | Effect Allele | Other Allele | Association with Exposure |       |          | Association with Outcome |       |       |
|-----------------|-----|-----------|---------------|--------------|---------------------------|-------|----------|--------------------------|-------|-------|
|                 |     |           |               |              | Beta                      | SE    | P        | Beta                     | SE    | P     |
| rs10954732      | 7   | 75611149  | A             | G            | 0.011                     | 0.002 | 3.60E-08 | 0.002                    | 0.025 | 0.935 |
| rs11012726      | 10  | 21797272  | C             | T            | -0.012                    | 0.002 | 6.20E-10 | 0.046                    | 0.027 | 0.088 |
| rs11125629      | 2   | 24732568  | G             | A            | 0.011                     | 0.002 | 2.50E-09 | -0.001                   | 0.025 | 0.984 |
| rs1421085       | 16  | 53800954  | C             | T            | 0.012                     | 0.002 | 7.70E-11 | -0.010                   | 0.025 | 0.694 |
| rs1963510       | 14  | 98647033  | G             | A            | 0.013                     | 0.002 | 2.60E-13 | -0.003                   | 0.025 | 0.912 |
| rs2198234       | 2   | 104159202 | T             | G            | 0.012                     | 0.002 | 1.30E-10 | -0.025                   | 0.025 | 0.312 |
| rs2229357       | 12  | 57843711  | A             | G            | -0.012                    | 0.002 | 7.90E-09 | 0.019                    | 0.029 | 0.516 |
| rs2274156       | 6   | 33857564  | T             | C            | -0.011                    | 0.002 | 2.90E-08 | -0.023                   | 0.028 | 0.404 |
| rs2305813       | 1   | 150981267 | C             | G            | -0.019                    | 0.003 | 5.00E-12 | 0.023                    | 0.033 | 0.479 |
| rs2435200       | 17  | 44071851  | A             | G            | 0.011                     | 0.002 | 1.10E-09 | -0.060                   | 0.027 | 0.025 |
| rs2472297       | 15  | 75027880  | T             | C            | -0.033                    | 0.002 | 2.40E-59 | 0.036                    | 0.029 | 0.221 |
| rs34940743      | 14  | 80102233  | G             | A            | -0.010                    | 0.002 | 4.40E-08 | 0.007                    | 0.026 | 0.780 |
| rs34967813      | 1   | 237841390 | G             | A            | -0.012                    | 0.002 | 7.10E-10 | 0.007                    | 0.029 | 0.806 |
| rs35028442      | 9   | 115207868 | C             | G            | 0.016                     | 0.003 | 9.90E-10 | -0.048                   | 0.039 | 0.224 |
| rs3763874       | 11  | 9546587   | A             | G            | 0.016                     | 0.002 | 6.90E-19 | -0.020                   | 0.027 | 0.451 |
| rs3808058       | 7   | 127668071 | T             | C            | 0.018                     | 0.003 | 7.50E-11 | 0.009                    | 0.040 | 0.834 |
| rs4603502       | 15  | 47874654  | C             | T            | -0.013                    | 0.002 | 5.40E-11 | 0.012                    | 0.030 | 0.696 |
| rs56100328      | 20  | 45939264  | G             | A            | -0.018                    | 0.003 | 4.80E-08 | -0.039                   | 0.042 | 0.363 |
| rs67174962      | 5   | 164760067 | A             | G            | -0.012                    | 0.002 | 1.30E-08 | -0.037                   | 0.032 | 0.246 |
| rs6835325       | 4   | 46746220  | G             | T            | -0.012                    | 0.002 | 2.00E-09 | 0.021                    | 0.026 | 0.421 |
| rs6844845       | 4   | 24206877  | G             | A            | -0.022                    | 0.004 | 3.30E-08 | -0.019                   | 0.079 | 0.810 |
| rs6905712       | 6   | 165246071 | A             | T            | 0.011                     | 0.002 | 8.90E-09 | -0.044                   | 0.029 | 0.128 |
| rs6957745       | 7   | 73056750  | C             | T            | -0.015                    | 0.002 | 1.40E-11 | -0.005                   | 0.033 | 0.882 |
| rs7124005       | 11  | 131658253 | T             | C            | 0.010                     | 0.002 | 2.50E-08 | 0.003                    | 0.025 | 0.899 |
| rs7626335       | 3   | 71575177  | C             | A            | 0.011                     | 0.002 | 2.50E-08 | 0.008                    | 0.027 | 0.763 |
| rs782221        | 1   | 72924057  | T             | C            | -0.013                    | 0.002 | 1.90E-08 | 0.057                    | 0.035 | 0.111 |
| rs8054636       | 16  | 19246136  | C             | T            | -0.010                    | 0.002 | 2.40E-08 | 0.004                    | 0.025 | 0.866 |
| rs9414686       | 9   | 141019422 | T             | C            | 0.015                     | 0.002 | 8.60E-10 | -0.035                   | 0.039 | 0.363 |
| rs9830293       | 3   | 52147485  | G             | A            | 0.019                     | 0.003 | 4.00E-08 | 0.009                    | 0.036 | 0.801 |
| rs9957088       | 18  | 28509237  | T             | C            | -0.012                    | 0.002 | 1.40E-08 | -0.005                   | 0.029 | 0.878 |

## (C) Water intake || id:ukb-b-14898 on Diabetic retinopathy (more controls excluded) || id:finn-b-DM\_RETINOPATHY\_EXMORE

(33-SNP- $P < 5.0 \times 10^{-8}$ )

| Variant<br>rsID | Chr | Position  | Effect Allele | Other Allele | Association with Exposure |       |          | Association with Outcome |       |       |
|-----------------|-----|-----------|---------------|--------------|---------------------------|-------|----------|--------------------------|-------|-------|
|                 |     |           |               |              | Beta                      | SE    | P        | Beta                     | SE    | P     |
| rs10954732      | 7   | 75611149  | A             | G            | 0.011                     | 0.002 | 3.60E-08 | -0.013                   | 0.013 | 0.337 |
| rs11012726      | 10  | 21797272  | C             | T            | -0.012                    | 0.002 | 6.20E-10 | 0.027                    | 0.014 | 0.059 |
| rs11125629      | 2   | 24732568  | G             | A            | 0.011                     | 0.002 | 2.50E-09 | 0.018                    | 0.013 | 0.177 |
| rs11140831      | 9   | 87647454  | G             | A            | -0.012                    | 0.002 | 1.50E-11 | -0.005                   | 0.013 | 0.690 |
| rs146394874     | 14  | 33360641  | A             | C            | 0.026                     | 0.004 | 5.80E-10 | -0.002                   | 0.071 | 0.975 |
| rs1963510       | 14  | 98647033  | G             | A            | 0.013                     | 0.002 | 2.60E-13 | -0.009                   | 0.013 | 0.500 |
| rs2198234       | 2   | 104159202 | T             | G            | 0.012                     | 0.002 | 1.30E-10 | -0.021                   | 0.013 | 0.119 |
| rs2229357       | 12  | 57843711  | A             | G            | -0.012                    | 0.002 | 7.90E-09 | 0.010                    | 0.016 | 0.524 |
| rs2274156       | 6   | 33857564  | T             | C            | -0.011                    | 0.002 | 2.90E-08 | 0.033                    | 0.015 | 0.025 |
| rs2289292       | 16  | 30097630  | T             | C            | -0.013                    | 0.002 | 3.40E-11 | -0.001                   | 0.013 | 0.957 |
| rs2305813       | 1   | 150981267 | C             | G            | -0.019                    | 0.003 | 5.00E-12 | 0.009                    | 0.017 | 0.611 |
| rs2435200       | 17  | 44071851  | A             | G            | 0.011                     | 0.002 | 1.10E-09 | -0.008                   | 0.014 | 0.555 |
| rs2472297       | 15  | 75027880  | T             | C            | -0.033                    | 0.002 | 2.40E-59 | 0.037                    | 0.015 | 0.017 |
| rs34940743      | 14  | 80102233  | G             | A            | -0.010                    | 0.002 | 4.40E-08 | 0.023                    | 0.014 | 0.101 |
| rs34967813      | 1   | 237841390 | G             | A            | -0.012                    | 0.002 | 7.10E-10 | 0.038                    | 0.015 | 0.011 |
| rs35028442      | 9   | 115207868 | C             | G            | 0.016                     | 0.003 | 9.90E-10 | -0.017                   | 0.021 | 0.420 |
| rs3763874       | 11  | 9546587   | A             | G            | 0.016                     | 0.002 | 6.90E-19 | -0.037                   | 0.014 | 0.010 |
| rs3808058       | 7   | 127668071 | T             | C            | 0.018                     | 0.003 | 7.50E-11 | -0.001                   | 0.021 | 0.965 |
| rs4239466       | 18  | 52612778  | C             | A            | 0.011                     | 0.002 | 2.00E-08 | -0.007                   | 0.013 | 0.620 |
| rs4410790       | 7   | 17284577  | C             | T            | -0.031                    | 0.002 | 8.60E-61 | 0.010                    | 0.014 | 0.494 |
| rs4603502       | 15  | 47874654  | C             | T            | -0.013                    | 0.002 | 5.40E-11 | 0.012                    | 0.016 | 0.435 |
| rs56100328      | 20  | 45939264  | G             | A            | -0.018                    | 0.003 | 4.80E-08 | -0.002                   | 0.022 | 0.919 |
| rs67174962      | 5   | 164760067 | A             | G            | -0.012                    | 0.002 | 1.30E-08 | -0.015                   | 0.017 | 0.377 |
| rs6835325       | 4   | 46746220  | G             | T            | -0.012                    | 0.002 | 2.00E-09 | 0.001                    | 0.014 | 0.970 |
| rs6844845       | 4   | 24206877  | G             | A            | -0.022                    | 0.004 | 3.30E-08 | -0.043                   | 0.042 | 0.308 |
| rs6905712       | 6   | 165246071 | A             | T            | 0.011                     | 0.002 | 8.90E-09 | 0.011                    | 0.015 | 0.455 |
| rs6957745       | 7   | 73056750  | C             | T            | -0.015                    | 0.002 | 1.40E-11 | 0.030                    | 0.017 | 0.083 |
| rs7124005       | 11  | 131658253 | T             | C            | 0.010                     | 0.002 | 2.50E-08 | 0.005                    | 0.013 | 0.688 |
| rs7626335       | 3   | 71575177  | C             | A            | 0.011                     | 0.002 | 2.50E-08 | -0.006                   | 0.014 | 0.673 |
| rs8054636       | 16  | 19246136  | C             | T            | -0.010                    | 0.002 | 2.40E-08 | -0.010                   | 0.013 | 0.466 |
| rs9414686       | 9   | 141019422 | T             | C            | 0.015                     | 0.002 | 8.60E-10 | -0.027                   | 0.021 | 0.191 |
| rs9830293       | 3   | 52147485  | G             | A            | 0.019                     | 0.003 | 4.00E-08 | 0.022                    | 0.019 | 0.254 |
| rs9957088       | 18  | 28509237  | T             | C            | -0.012                    | 0.002 | 1.40E-08 | 0.007                    | 0.015 | 0.645 |

(D) Water intake || id:ukb-b-14898 on Glaucoma || id:finn-b-H7\_GLAUCOMA (33-SNP-P < 5.0×10<sup>-8</sup>)

| Variant<br>rsID | Chr | Position  | Effect Allele | Other Allele | Association with Exposure |       |          | Association with Outcome |       |       |
|-----------------|-----|-----------|---------------|--------------|---------------------------|-------|----------|--------------------------|-------|-------|
|                 |     |           |               |              | Beta                      | SE    | P        | Beta                     | SE    | P     |
| rs10954732      | 7   | 75611149  | A             | G            | 0.011                     | 0.002 | 3.60E-08 | 0.003                    | 0.017 | 0.850 |
| rs11012726      | 10  | 21797272  | C             | T            | -0.012                    | 0.002 | 6.20E-10 | 0.006                    | 0.018 | 0.736 |
| rs11125629      | 2   | 24732568  | G             | A            | 0.011                     | 0.002 | 2.50E-09 | -0.018                   | 0.017 | 0.275 |
| rs11140831      | 9   | 87647454  | G             | A            | -0.012                    | 0.002 | 1.50E-11 | 0.008                    | 0.017 | 0.629 |
| rs146394874     | 14  | 33360641  | A             | C            | 0.026                     | 0.004 | 5.80E-10 | -0.047                   | 0.091 | 0.608 |
| rs1963510       | 14  | 98647033  | G             | A            | 0.013                     | 0.002 | 2.60E-13 | -0.021                   | 0.017 | 0.204 |
| rs2198234       | 2   | 104159202 | T             | G            | 0.012                     | 0.002 | 1.30E-10 | -0.001                   | 0.017 | 0.940 |
| rs2229357       | 12  | 57843711  | A             | G            | -0.012                    | 0.002 | 7.90E-09 | -0.001                   | 0.020 | 0.960 |
| rs2274156       | 6   | 33857564  | T             | C            | -0.011                    | 0.002 | 2.90E-08 | -0.013                   | 0.019 | 0.506 |
| rs2289292       | 16  | 30097630  | T             | C            | -0.013                    | 0.002 | 3.40E-11 | -0.001                   | 0.017 | 0.975 |
| rs2305813       | 1   | 150981267 | C             | G            | -0.019                    | 0.003 | 5.00E-12 | -0.024                   | 0.022 | 0.282 |
| rs2435200       | 17  | 44071851  | A             | G            | 0.011                     | 0.002 | 1.10E-09 | 0.018                    | 0.018 | 0.324 |
| rs34940743      | 14  | 80102233  | G             | A            | -0.010                    | 0.002 | 4.40E-08 | -0.010                   | 0.018 | 0.556 |
| rs34967813      | 1   | 237841390 | G             | A            | -0.012                    | 0.002 | 7.10E-10 | -0.002                   | 0.019 | 0.925 |
| rs35028442      | 9   | 115207868 | C             | G            | 0.016                     | 0.003 | 9.90E-10 | -0.007                   | 0.026 | 0.801 |
| rs3763874       | 11  | 9546587   | A             | G            | 0.016                     | 0.002 | 6.90E-19 | 0.006                    | 0.018 | 0.732 |
| rs3808058       | 7   | 127668071 | T             | C            | 0.018                     | 0.003 | 7.50E-11 | -0.006                   | 0.027 | 0.814 |
| rs4239466       | 18  | 52612778  | C             | A            | 0.011                     | 0.002 | 2.00E-08 | 0.030                    | 0.017 | 0.081 |
| rs4410790       | 7   | 17284577  | C             | T            | -0.031                    | 0.002 | 8.60E-61 | -0.010                   | 0.018 | 0.583 |
| rs4603502       | 15  | 47874654  | C             | T            | -0.013                    | 0.002 | 5.40E-11 | 0.011                    | 0.020 | 0.593 |
| rs56100328      | 20  | 45939264  | G             | A            | -0.018                    | 0.003 | 4.80E-08 | -0.026                   | 0.028 | 0.362 |
| rs67174962      | 5   | 164760067 | A             | G            | -0.012                    | 0.002 | 1.30E-08 | -0.033                   | 0.022 | 0.135 |
| rs6835325       | 4   | 46746220  | G             | T            | -0.012                    | 0.002 | 2.00E-09 | -0.001                   | 0.017 | 0.946 |
| rs6844845       | 4   | 24206877  | G             | A            | -0.022                    | 0.004 | 3.30E-08 | 0.010                    | 0.054 | 0.859 |
| rs6905712       | 6   | 165246071 | A             | T            | 0.011                     | 0.002 | 8.90E-09 | 0.007                    | 0.019 | 0.725 |
| rs6957745       | 7   | 73056750  | C             | T            | -0.015                    | 0.002 | 1.40E-11 | -0.008                   | 0.022 | 0.723 |
| rs7124005       | 11  | 131658253 | T             | C            | 0.010                     | 0.002 | 2.50E-08 | 0.027                    | 0.017 | 0.110 |
| rs7626335       | 3   | 71575177  | C             | A            | 0.011                     | 0.002 | 2.50E-08 | -0.042                   | 0.018 | 0.020 |
| rs782221        | 1   | 72924057  | T             | C            | -0.013                    | 0.002 | 1.90E-08 | 0.010                    | 0.024 | 0.674 |
| rs8054636       | 16  | 19246136  | C             | T            | -0.010                    | 0.002 | 2.40E-08 | -0.012                   | 0.017 | 0.479 |
| rs9414686       | 9   | 141019422 | T             | C            | 0.015                     | 0.002 | 8.60E-10 | -0.055                   | 0.026 | 0.036 |
| rs9830293       | 3   | 52147485  | G             | A            | 0.019                     | 0.003 | 4.00E-08 | 0.007                    | 0.024 | 0.772 |
| rs9957088       | 18  | 28509237  | T             | C            | -0.012                    | 0.002 | 1.40E-08 | 0.000                    | 0.020 | 0.990 |

**Supplementary Table S2.** The overall F statistic of four analyses.

| Outcomes | No. of IVs | F     |
|----------|------------|-------|
| ARCs     | 34         | 20.77 |
| AMD      | 30         | 17.28 |
| DR       | 33         | 20.49 |
| Glaucoma | 33         | 19.38 |

**Supplementary Table S3.** Confounding Factors Eliminated SNPs by Phenoscanner.

| Confounding Factors |             |                                                           |
|---------------------|-------------|-----------------------------------------------------------|
| Outcome             | rsID        | Traits                                                    |
| ARCs                | rs1421085   | Diabetes diagnosed by doctor Alcohol intake frequency     |
|                     | rs782221    | Ever smoked Smoking status: previous Past tobacco smoking |
|                     | rs146394874 | Average weekly red wine intake                            |
| AMD                 | rs4410790   | Body mass index                                           |
|                     | rs2289292   | Weight Waist circumference Whole body fat mass            |
|                     | rs3746410   | Trunk predicted mass Weight                               |
|                     | rs429358    | Age-related macular degeneration                          |
|                     | rs11140831  | Body mass index adjusted for physical activity            |
|                     | rs4239466   | Hip circumference                                         |
|                     | rs146394874 | Average weekly red wine intake                            |
| DR                  | rs1421085   | high blood pressure                                       |
|                     | rs429358    | high cholesterol                                          |
|                     | rs782221    | Ever smoked Smoking status: previous Past tobacco smoking |
|                     | rs3746410   | Total cholesterol                                         |
| Glaucoma            | rs1421085   | Diabetes diagnosed by doct high blood pressure            |

**Supplementary Figure S1.** Leave-one-out sensitivity analyses of MR analyses.

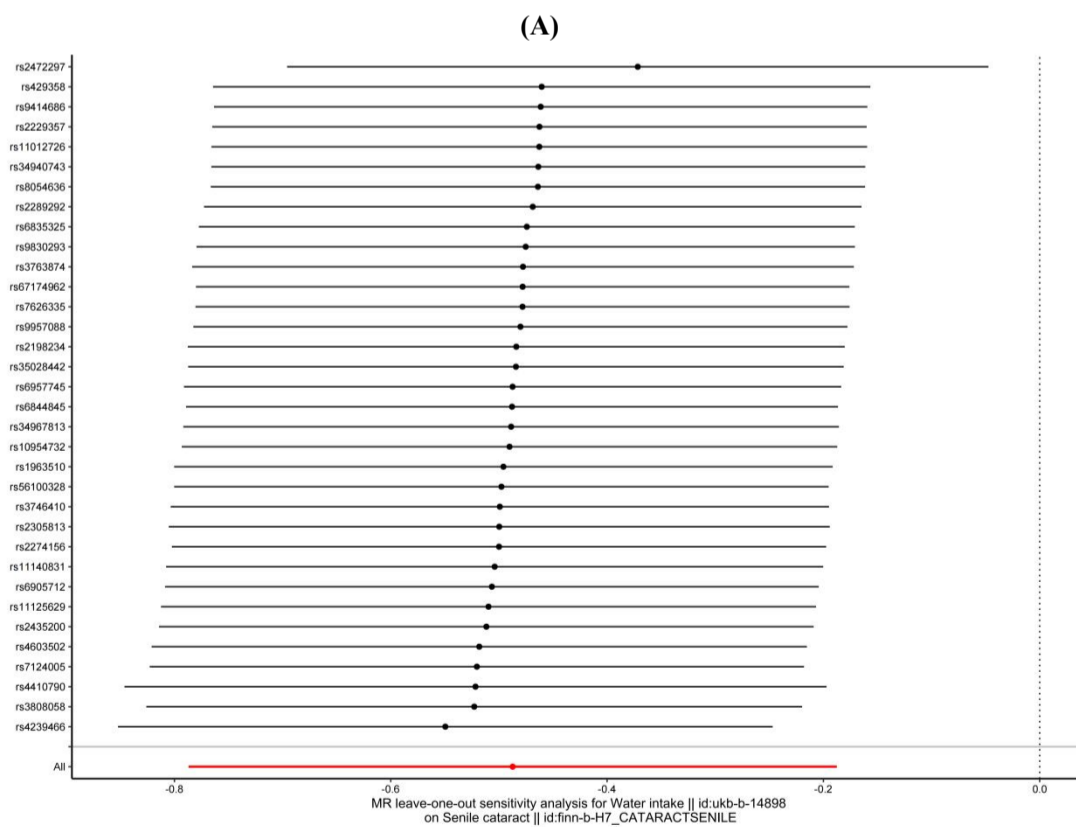

(B)

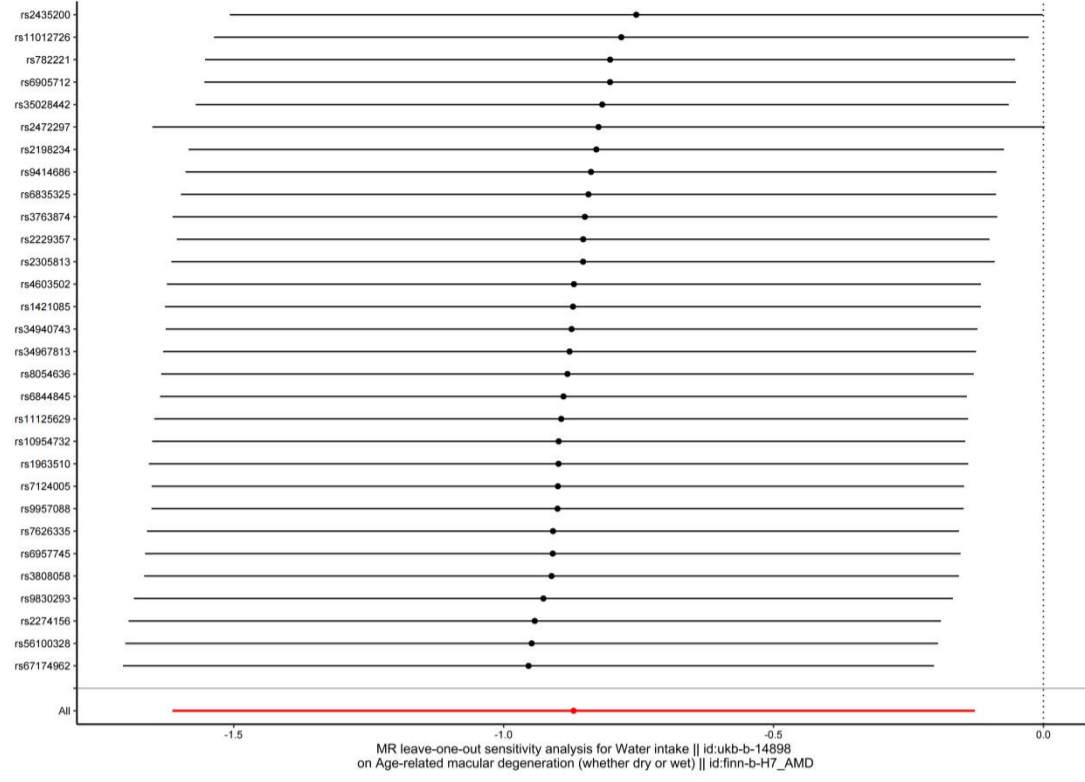

(C)

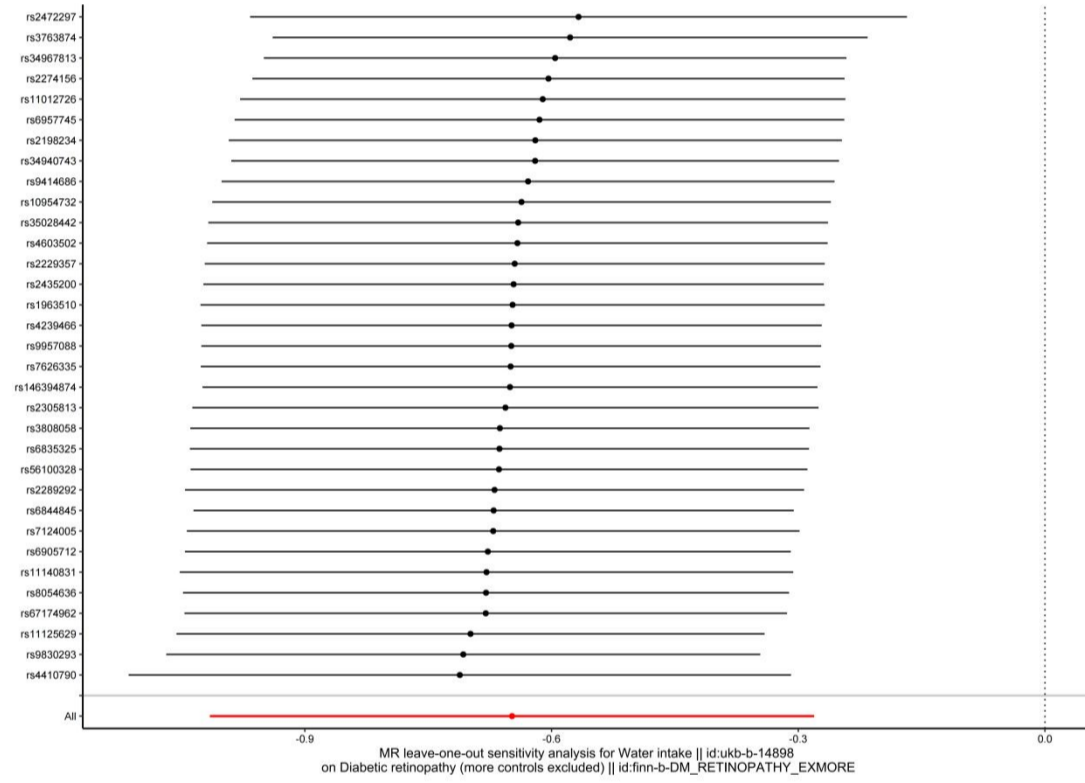

(D)

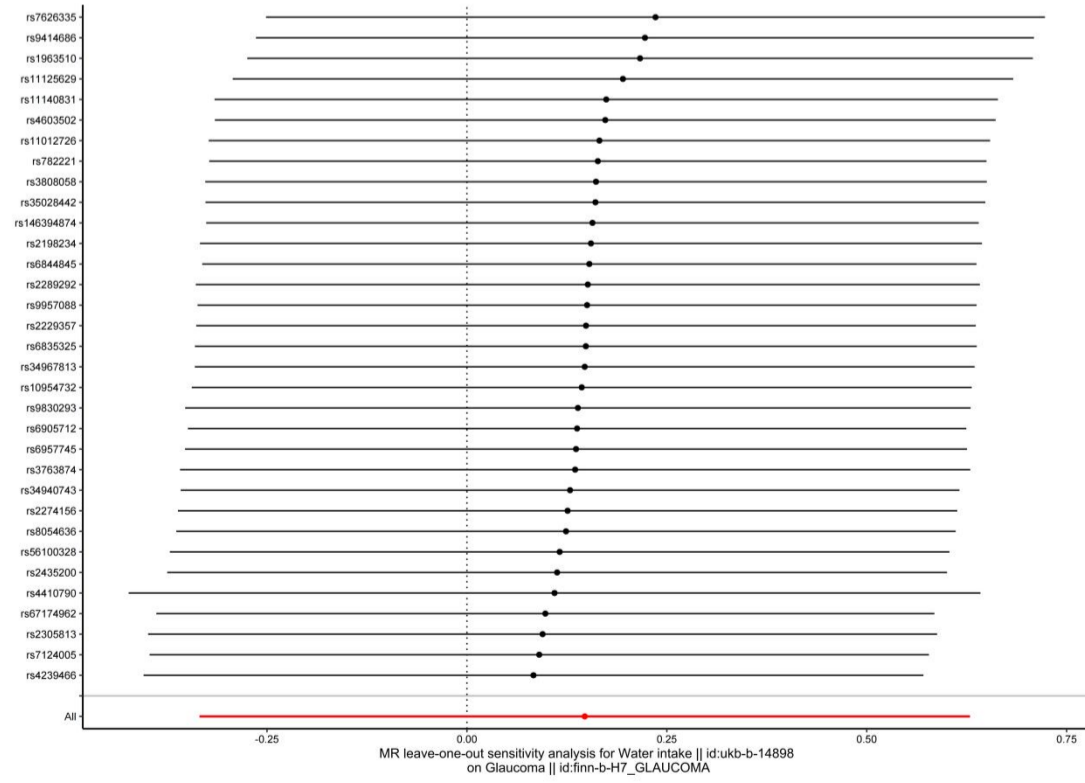

**Supplementary Figure S2. Validation dataset.**

- (A) Associations of genetically predicted Water intake with ARCs in FinnGen, in EBI, and combined analyses of both samples.  
 (B) Associations of genetically predicted Water intake with AMD in FinnGen, in GERA, and combined analyses of both samples.  
 (C) Associations of genetically predicted Water intake with Glaucoma in FinnGen, in EBI, and combined analyses of both samples.

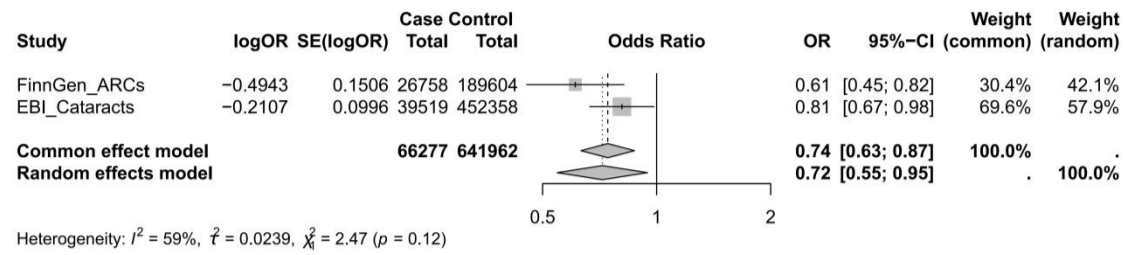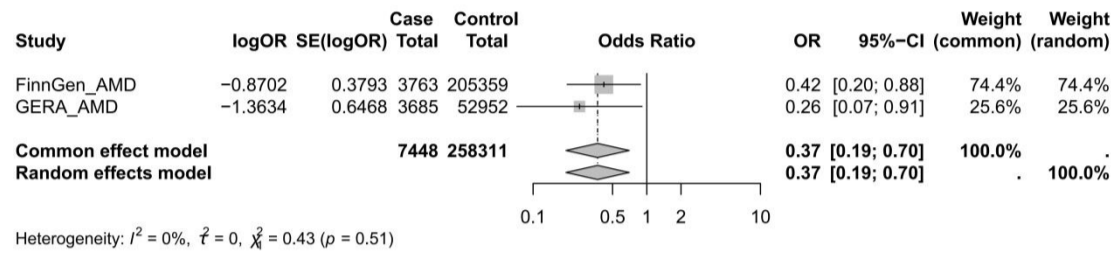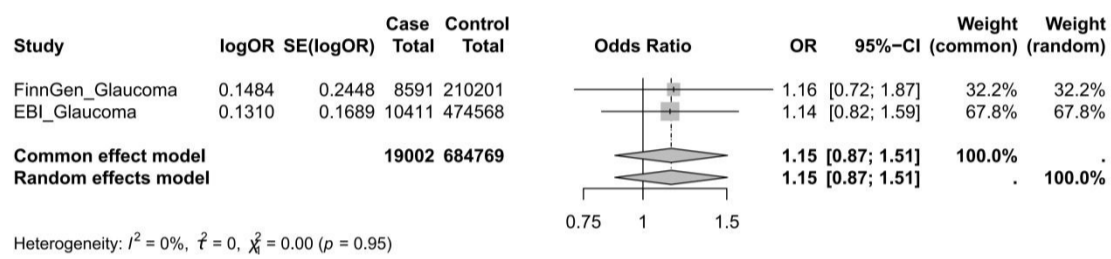

1. Guindo-Martínez M, Amela R, Bonàs-Guarch S, Puiggròs M, Salvoro C, Miguel-Escalada I, Carey CE, Cole JB, Rüeger S, Atkinson E, Leong A, Sanchez F, Ramon-Cortes C, Ejarque J, Palmer DS, Kurki M; FinnGen Consortium; Aragam K, Florez JC, Badia RM, Mercader JM, Torrents D. The impact of non-additive genetic associations on age-related complex diseases. Nat Commun.
2. Schwarzer G, Carpenter JR and Rücker G (2015): Meta-Analysis with R (Use-R!). Springer International Publishing, Switzerland.
